# Supplementary material for: Unusual chemical transformations of acetone thiosemicarbazone mediated by ruthenium: C–H bond activation, thiolation, and C–N bond cleavage
Source: Royal Society of Chemistry journal article supplement (doi:10.1039/c3ra44329a), 2013-10-14
Supplement: c3ra44329a.pdf [file c3ra44329a.pdf]

## **Electronic Supplementary Information**

### **Unusual chemical transformations of acetone thiosemicarbazone mediated by ruthenium: C-H bond activation, thiolation, and C-N bond cleavage**

Piyali Paul, Dipravath K. Seth, Michael G. Richmond and Samaresh Bhattacharya\*

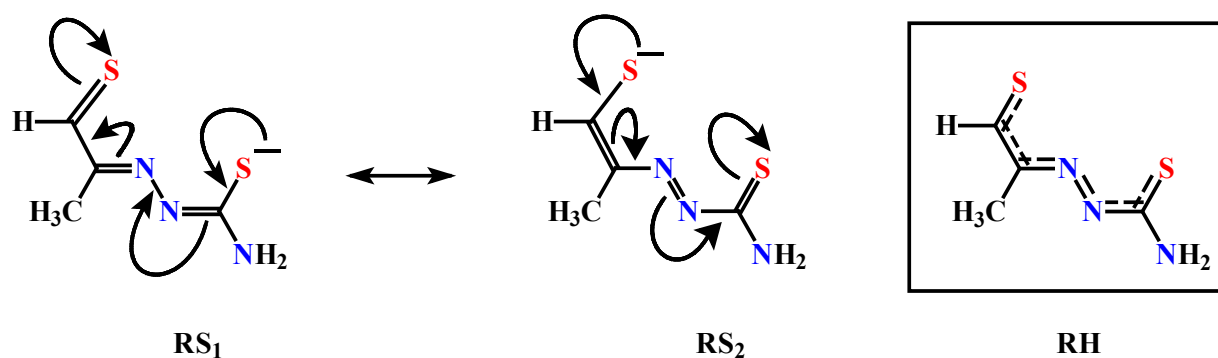

**Fig. S1** Possible resonance structures (**RS<sub>1</sub>** and **RS<sub>2</sub>**) and resonance hybrid (**RH**) for the anionic SNS-coordinated ligand in complex 1.

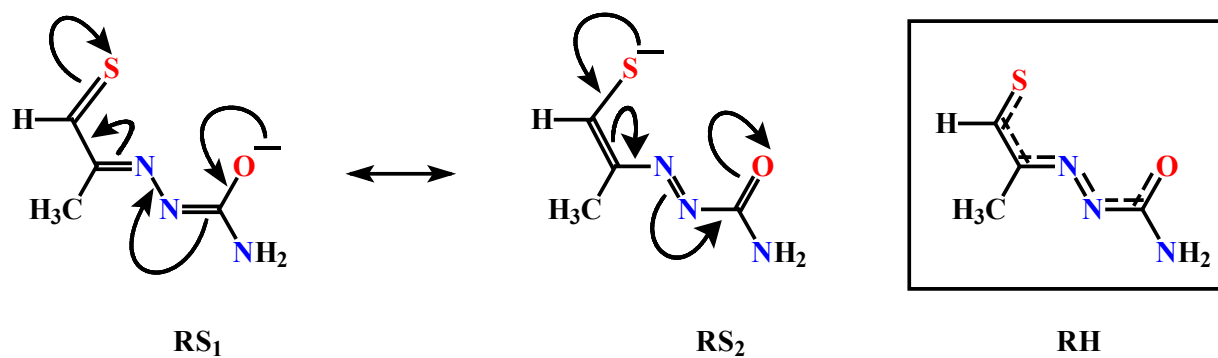

**Fig. S2** Possible resonance structures (**RS<sub>1</sub>** and **RS<sub>2</sub>**) and resonance hybrid (**RH**) for the anionic SNO-coordinated ligand in complex 2.

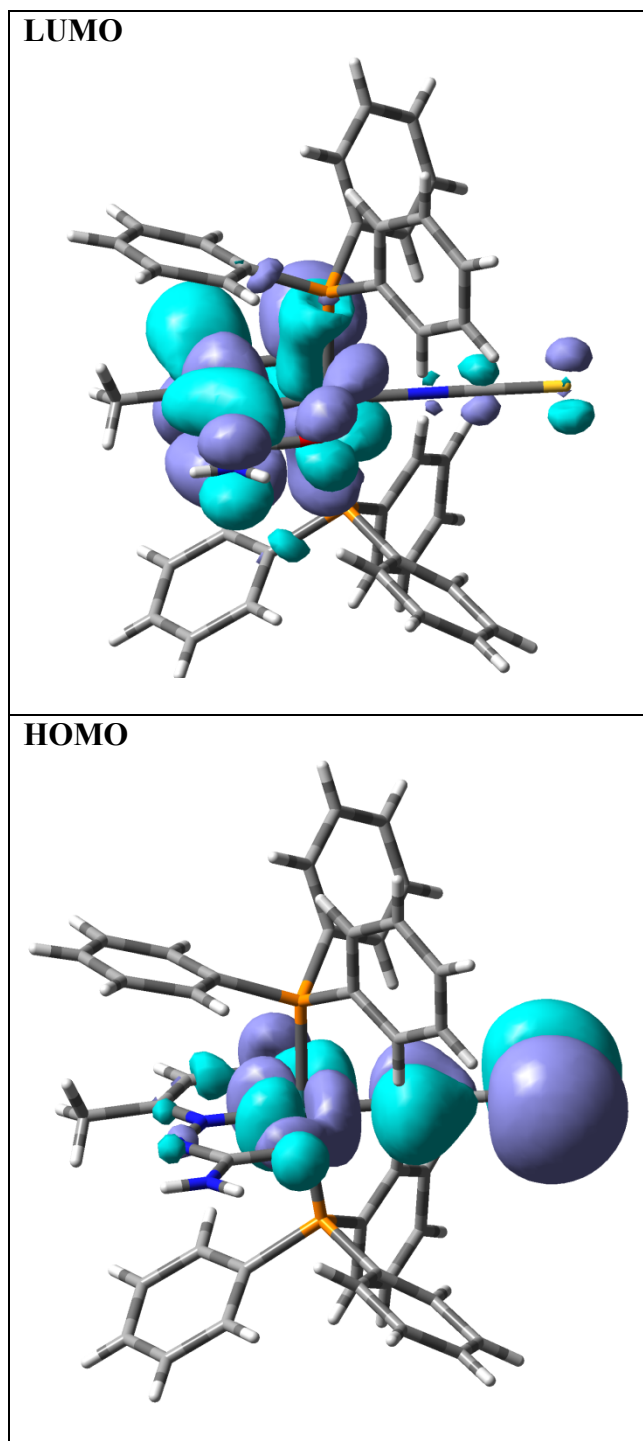

**Fig. S3** Contour plots of the HOMO and LUMO of complex **2**.

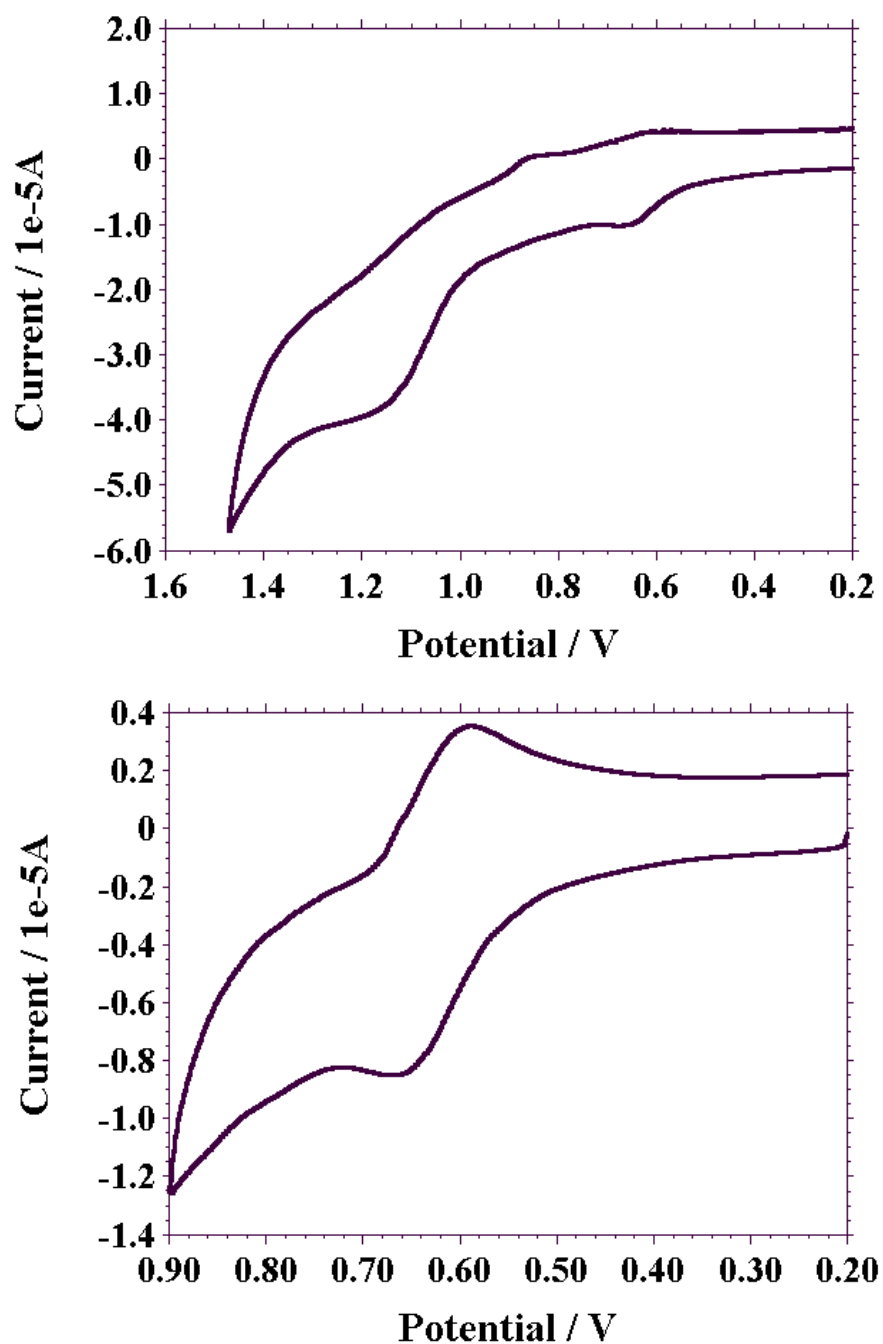

**Fig. S4** Cyclic voltammograms of complex **1** in acetonitrile solution (0.1 M TBHP) at a scan rate of 50 mVs<sup>-1</sup>. Both the oxidative responses are shown on top, and only the first oxidation is shown at the bottom as a segmented scan.
